# Supplementary material
Source: PubMed Central journal article supplement (PMC4443494)
Supplement: NIHMS677969-supplement-1.pdf [file NIHMS677969-supplement-1.pdf]

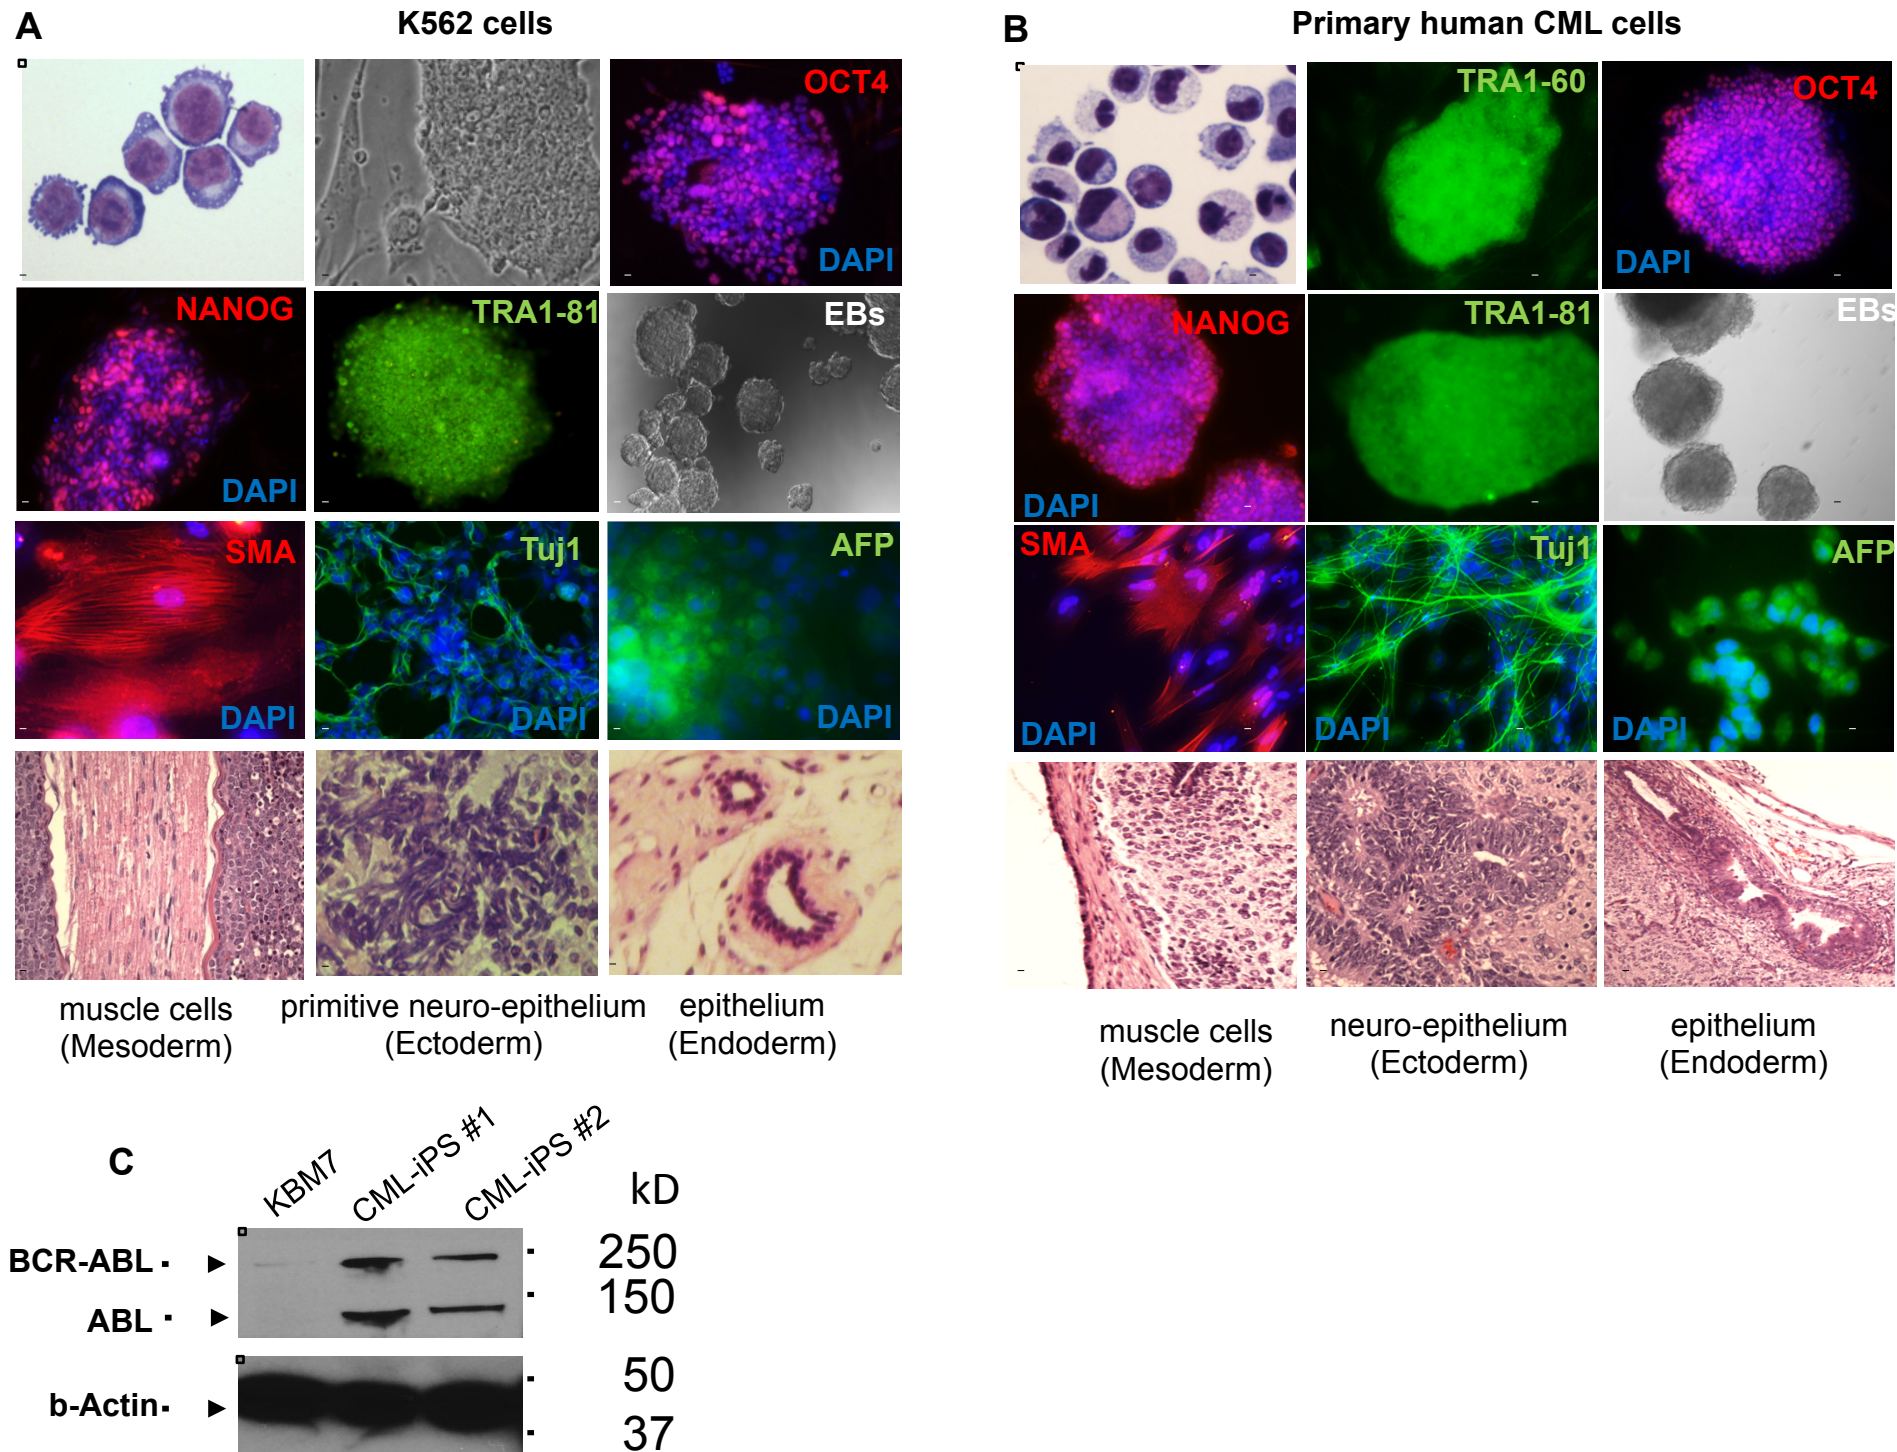

**Supplementary Figure 1. LiPS cells derivation and characterization.** (A-B) May Grunwald-Giemsa staining show morphology of the human K562 and primary CML cells. (Scale bars:20 $\mu$ m) Immunofluorescence images of the pluripotent transcription factors OCT4 and NANOG and of the pluripotent surface antigen TRA-1-81 and TRA1-60 in LiPS cells (Scale bars:200 $\mu$ m) . Representative phase image of embryoid bodies (EBs) derived from LiPS cells cultured in suspension in the absence of FGF (Scale bars:100 $\mu$ m) . LiPS clones were differentiated *in vitro* into all three germ layers: mesoderm (Smooth Muscle Actin (SMA) positive cardiomyocytes, red), ectoderm (TuJ1 positive neuronal cells, green), and endoderm ( $\alpha$ -fetoprotein positive, green) (Scale bars:100 $\mu$ m) . *In vivo* differentiation through teratoma formation identified derivatives of the three germ layers: muscle cells (mesoderm), neuro-epithelium (ectoderm) and epithelium structures (endoderm) (Scale bars:200 $\mu$ m) . C) Western blot analysis for ABL protein shows both the expression of the wild type ABL and of the fusion BCR-ABL onco-protein in LiPS clones derived from primary CML cells. KBM7 expresses low levels of BCR-ABL protein and no ABL protein due to haploidy.  $\beta$ -actin was used as loading control.

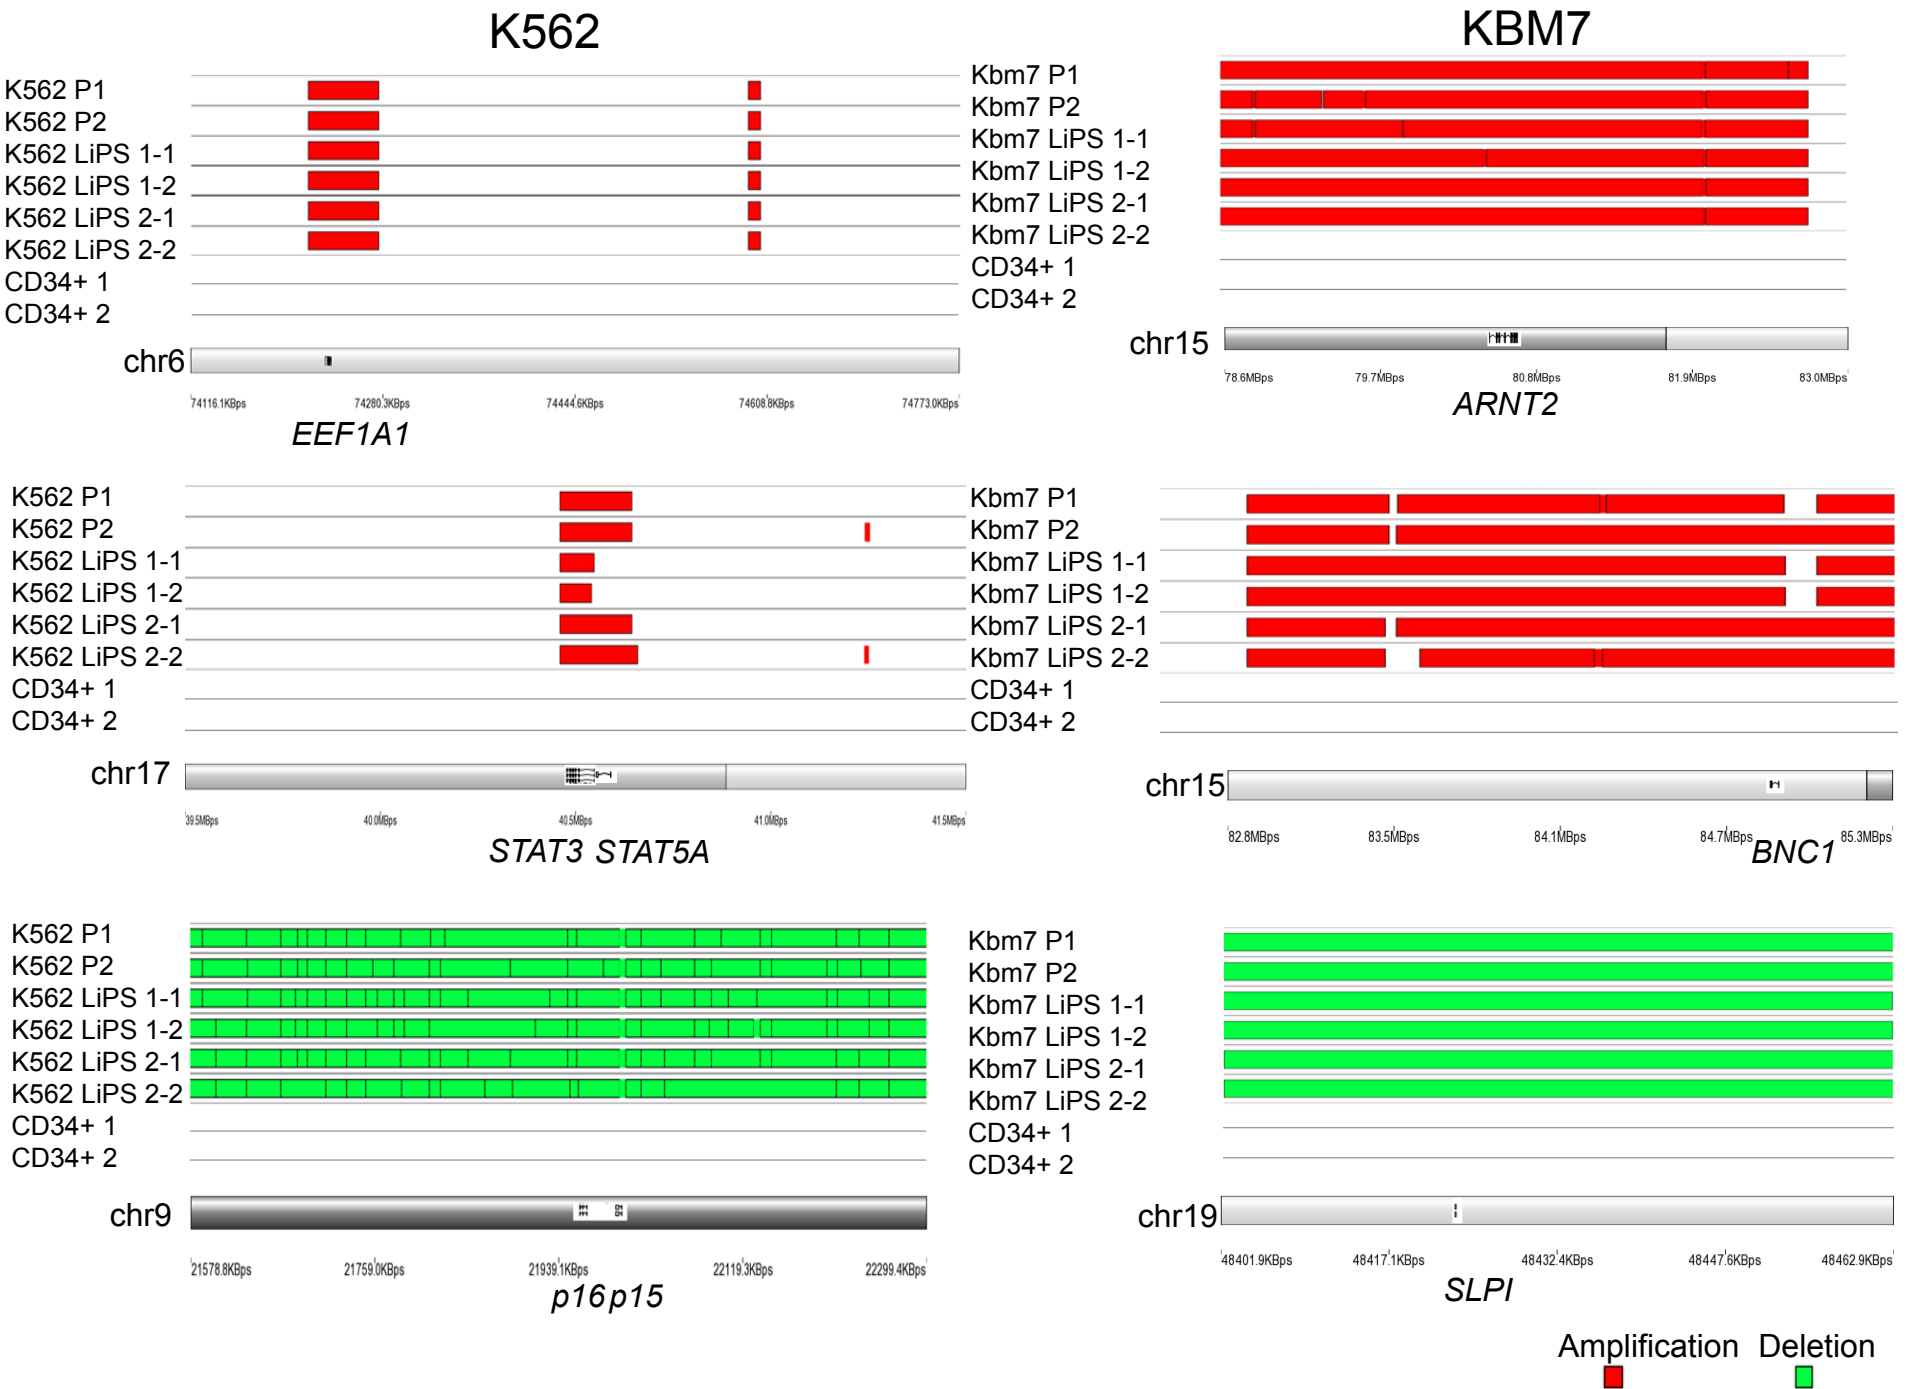

**Supplementary Figure 2. SNP array analysis of K562 and KBM7 cell lines and their reprogrammed clones.** DNA copy number gained (red) or loss (green) of representative genes in parental K562 and KBM/7 cell lines and their LiPS clones. Human CD34<sup>+</sup> bone marrow cells were used as normal control.

### Pluripotent promoters

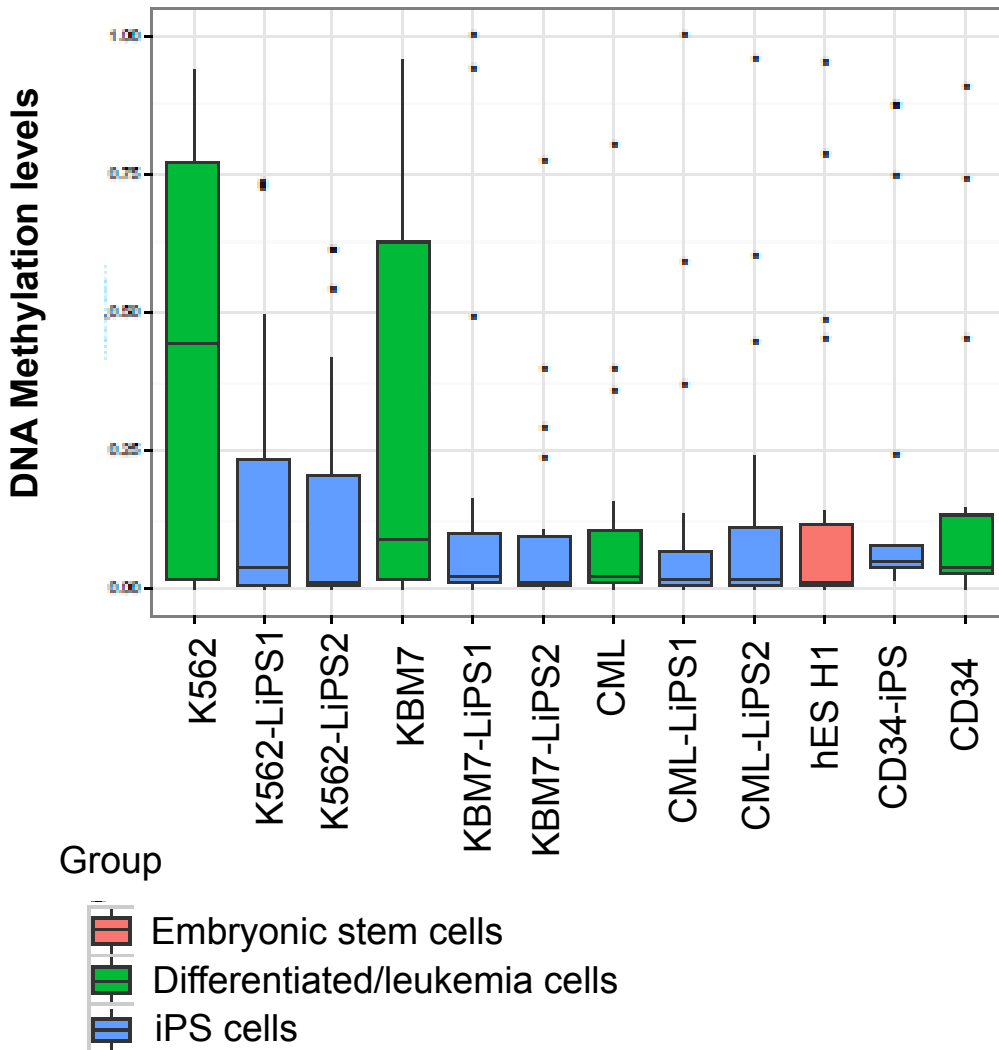

**Supplementary Figure 3. DNA methylation levels at pluripotency genes in leukemic and LiPS cells.** Boxplots of % methylation levels in K562, KBM7, primary CML cells and their reprogrammed clones showing a significant reduction of DNA methylation in all pluripotent cells. Human ES, CD34<sup>+</sup> and CD34-iPS cells were used as control. The horizontal bar indicates the median, the box indicates the first and third quartile, the whiskers indicate 1.5 times the interquartile range and points outside of the whiskers represent “outliers”.

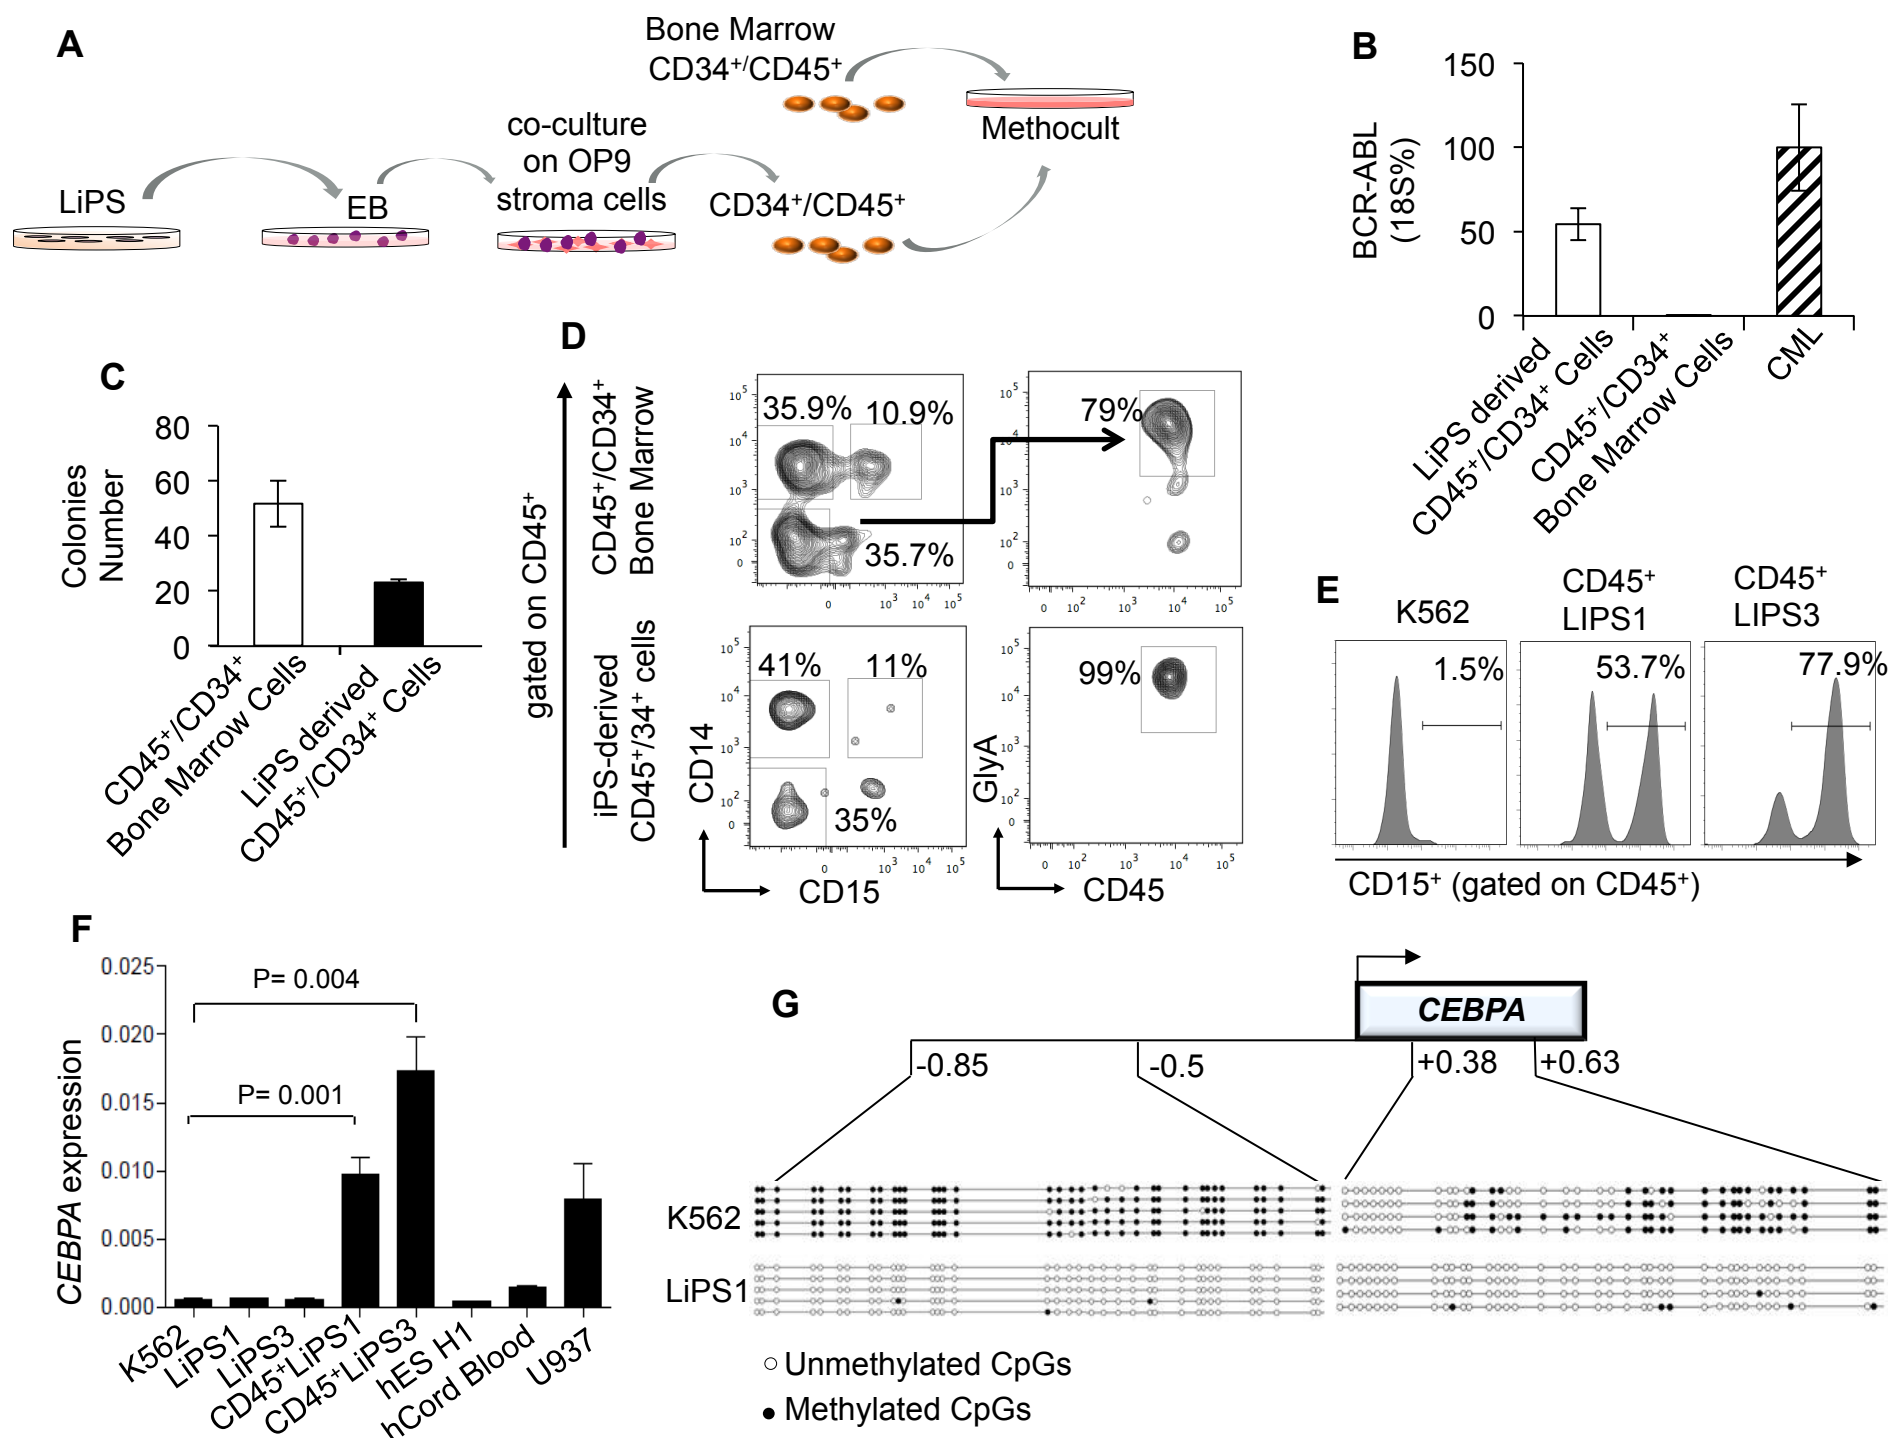

**Supplementary Figure 4. Reprogramming restores myeloid differentiation.** **A)** Schematic outline of *in vitro* differentiation of CML-LiPS derived CD45<sup>+</sup>/CD34<sup>+</sup> cells and CD45<sup>+</sup>/CD34<sup>+</sup> bone marrow control; **B)** CML-LiPS derived CD45<sup>+</sup>/CD34<sup>+</sup> cells retain BCR-ABL expression qRT-PCR, bars indicate mean  $\pm$ s.d. (n=2). **C)** Colonies obtained from CML-LiPS derived CD45<sup>+</sup>/CD34<sup>+</sup> and bone marrow control two weeks in methocult. The bar chart demonstrates average value plus standard deviation of three independent experiments (n=3). **D)** FACS analysis of differentiated CML-LiPS derived CD45<sup>+</sup>/CD34<sup>+</sup> cells and CD45<sup>+</sup>/CD34<sup>+</sup> bone marrow control three weeks in methocult. **E)** FACS analysis of differentiated CD45<sup>+</sup> LiPS cells and their parental leukemic counterpart K562. **F)** *CEBPA* expression levels in hematopoietic (K562, CD45<sup>+</sup> LiPS1, CD45<sup>+</sup> LiPS3, human Cord Blood and U937 leukemia cells) and pluripotent cells (LiPS clone 1, LiPS clone 3 and hES H1 cells). Hematopoietic CD45<sup>+</sup> LiPS1 and CD45<sup>+</sup> LiPS3 cells show significant increase in *CEBPA* gene expression as compared to parental leukemia cells. qRT-PCR, bars indicate mean  $\pm$ s.d.(n=3) (\* $P$ <0.05; \*\* $P$ <0.01 and \*\*\* $P$ <0.001; Student's *t*-test). **G)** Effect of reprogramming on DNA methylation of *CEBPA* locus and lollipop representation of bisulphite sequenced clones.

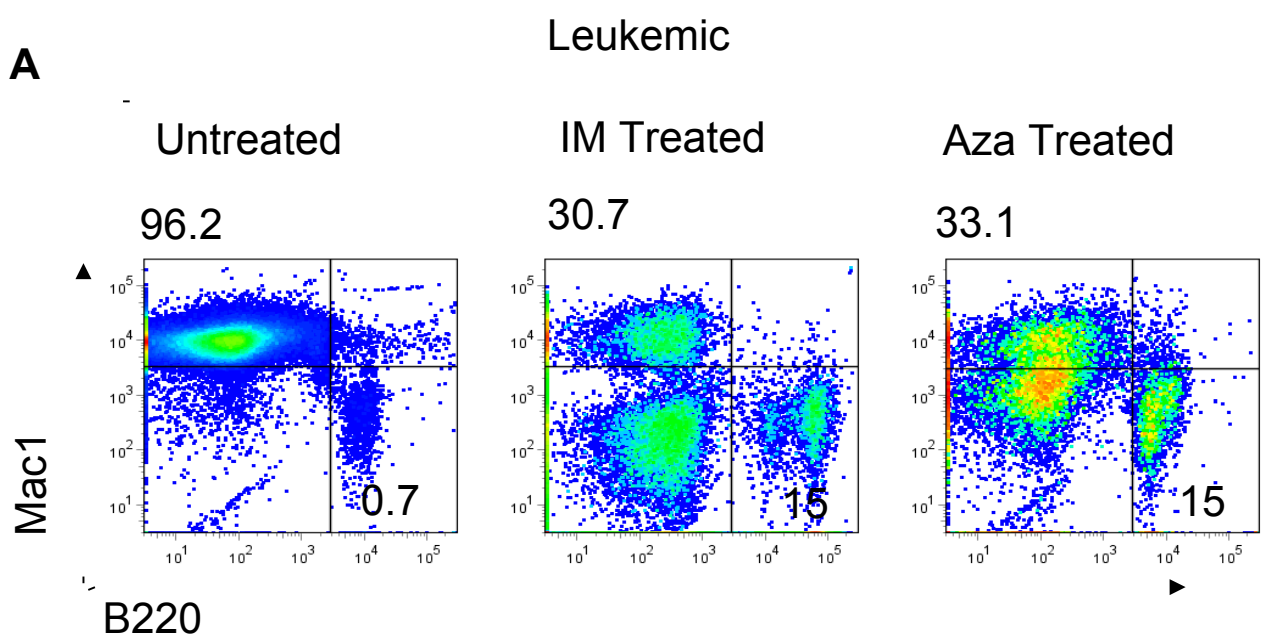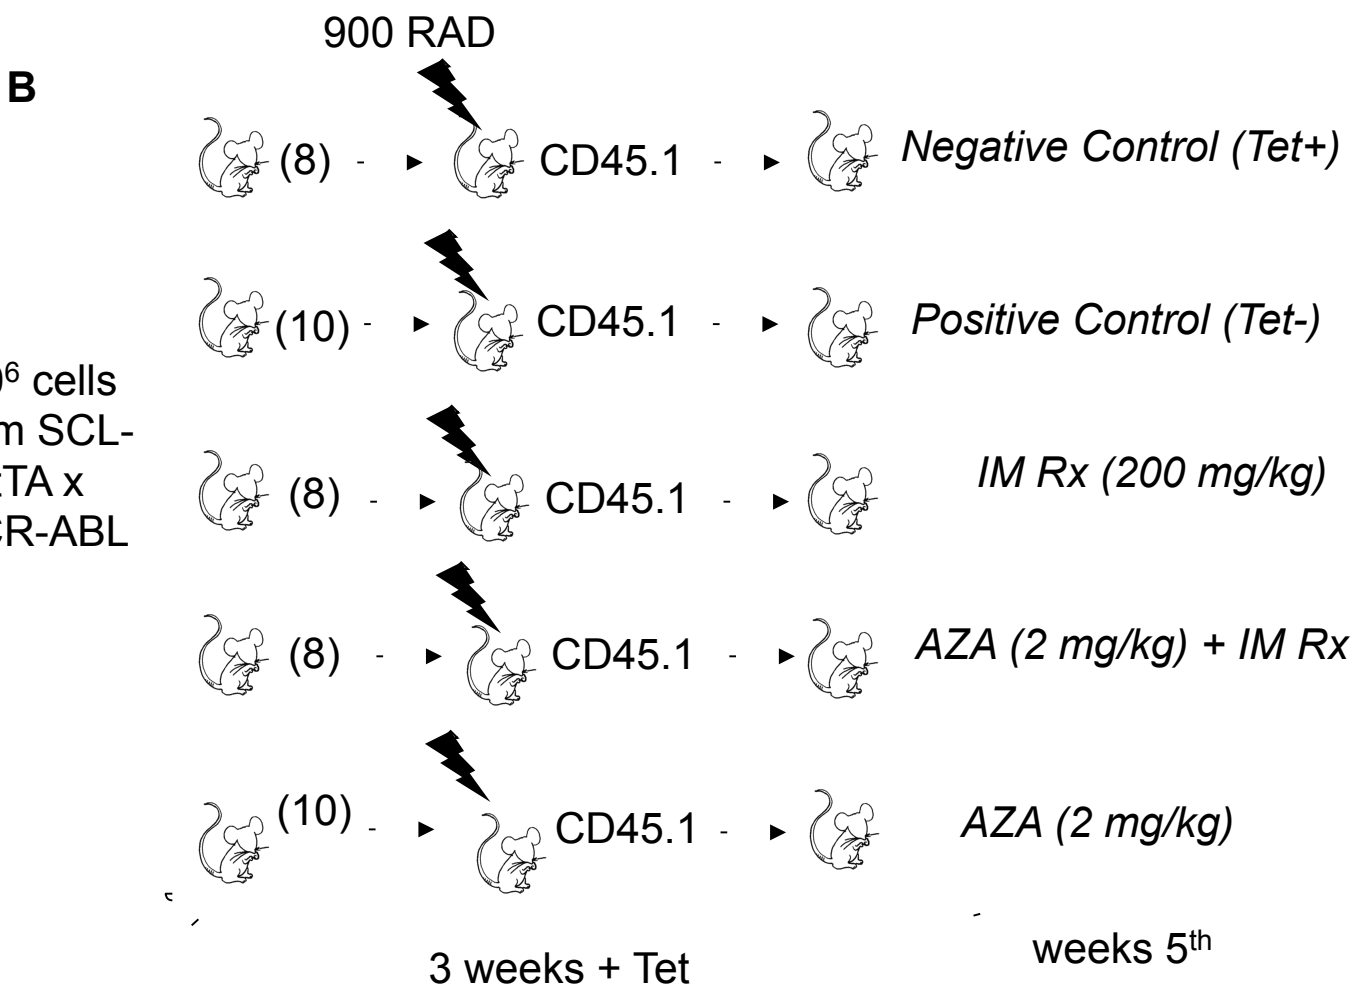

**Supplementary Figure 5. Azacitidine treatment in leukemic mice.** **A)** Bone Marrow from BCR-ABL leukemic mice treated for one month with AZA shows restoration of lymphopoiesis and strong reduction of Mac1<sup>+</sup> and Gr1<sup>+</sup> myeloid population when compared to the untreated mice, similarly as the Imatinib treated cohort. **B)** Schematic overview of the drug treatment applied for the survival studies (Additional details are described in the Material and Methods).

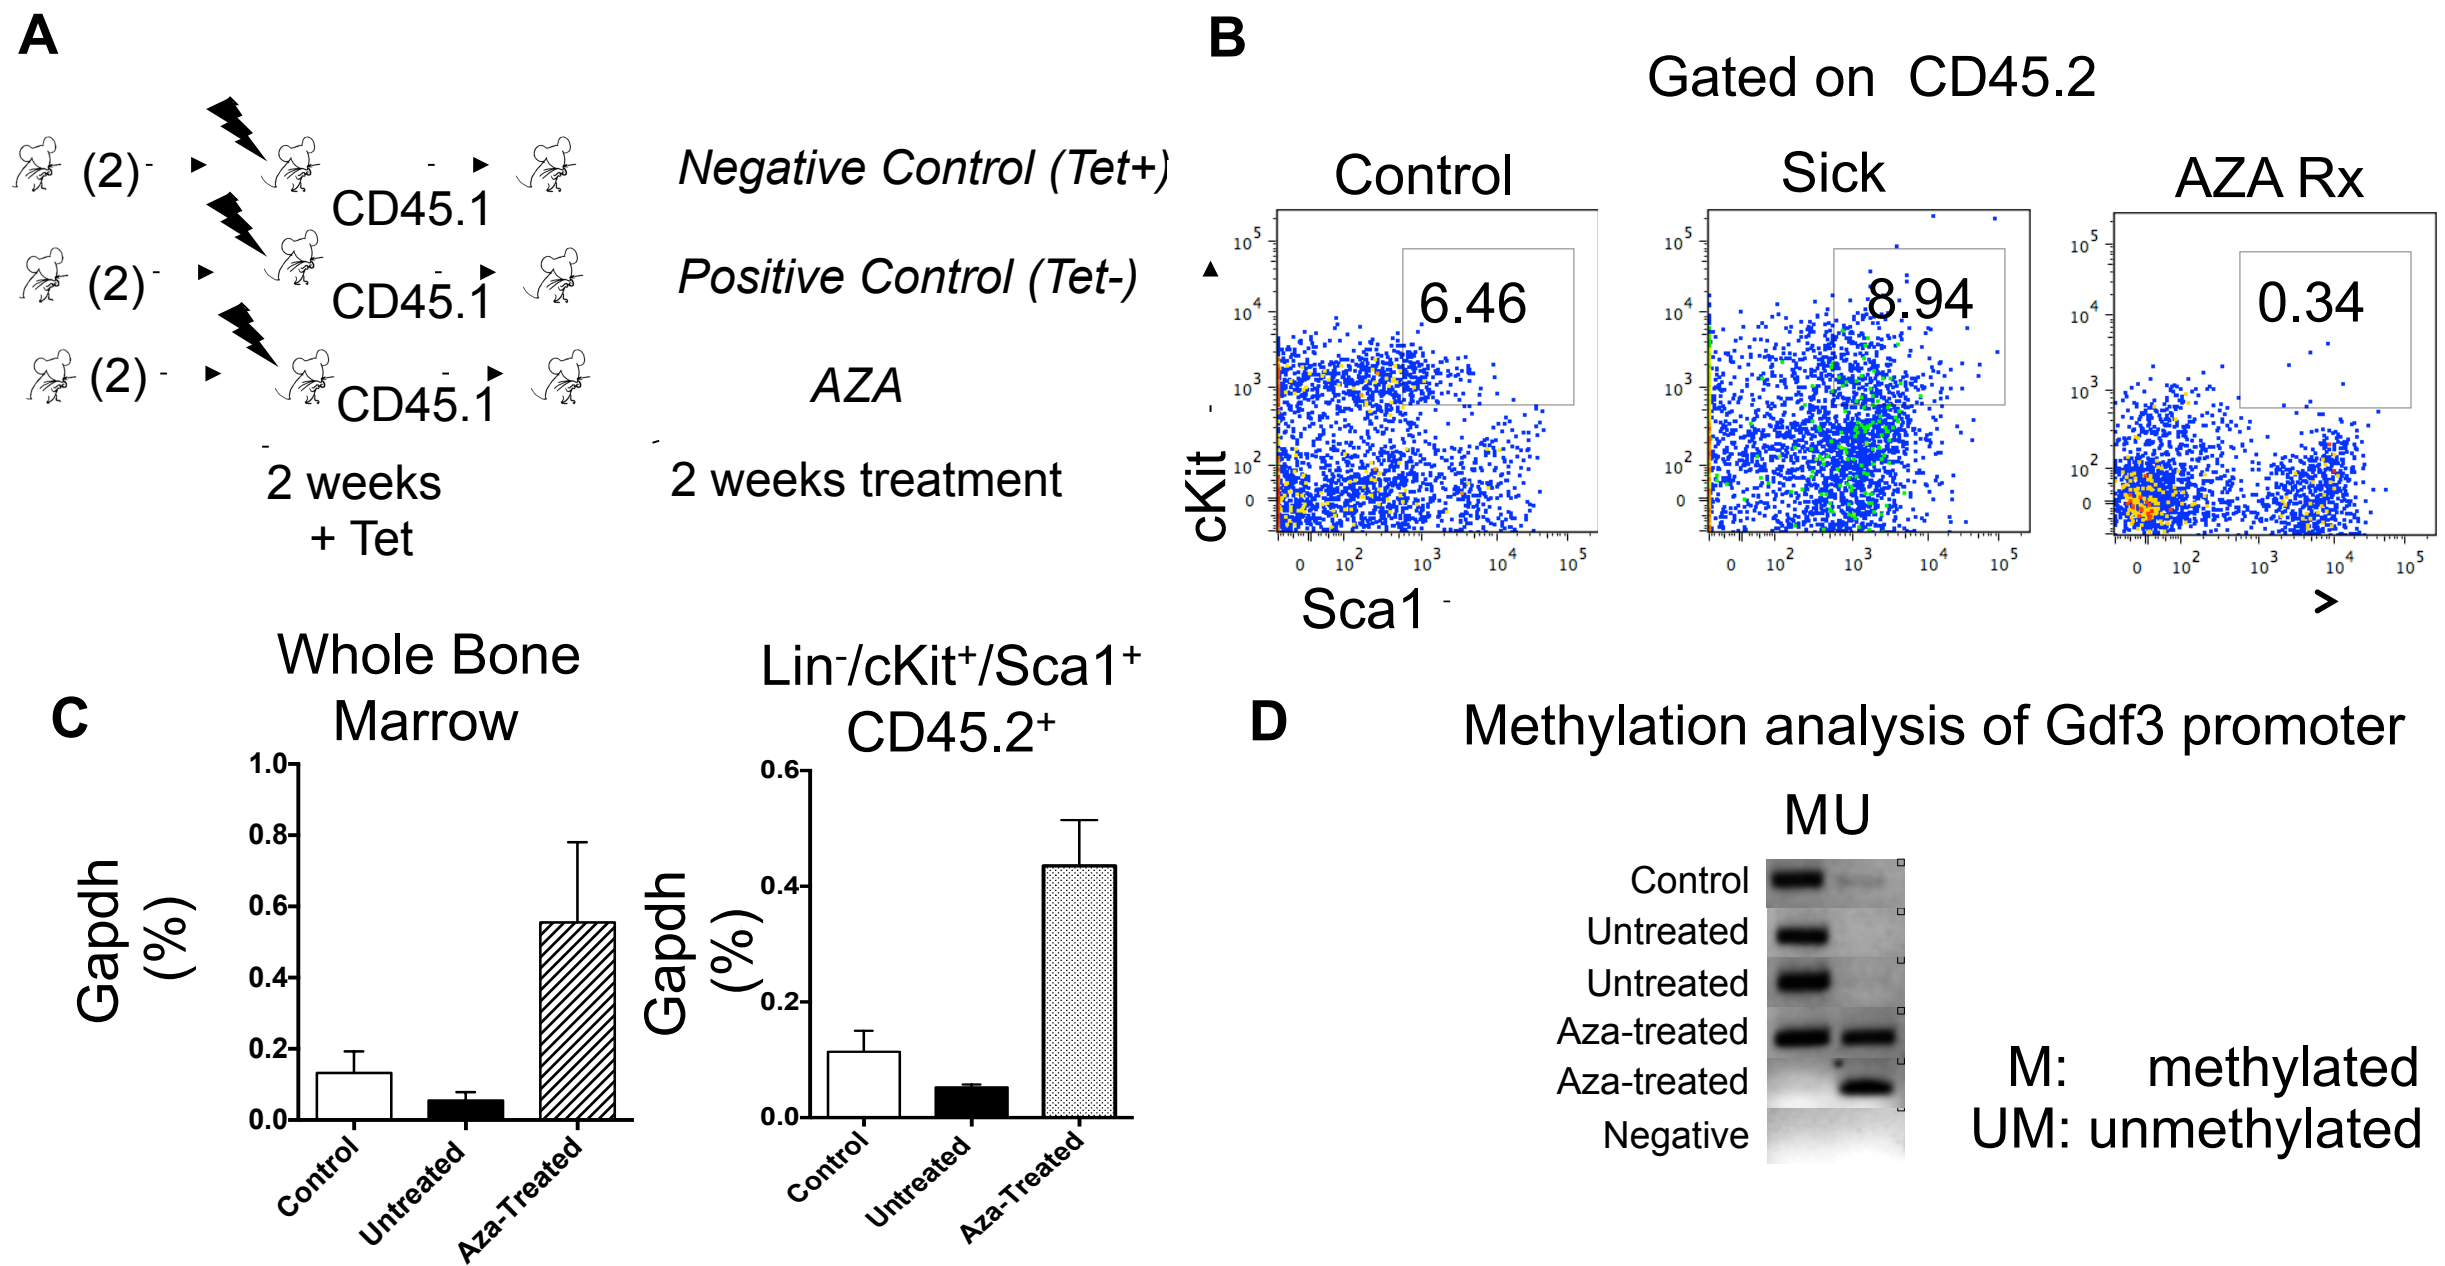

**Supplementary Figure 6. Methylation and Expression analysis of Azacytidine treated mice.** **A)** Outline of the experiment; **B)** FACS analysis of donor (CD45.2) LSK population shows expansion of the HSCs compartment in the untreated group and drastic reduction in the AZA-treated as compared to control; **C)** Expression levels of murine Gdf3 in both total Bone Marrow (left) and CD45.2<sup>+</sup>/LSK cells (right) qRT-PCR, bars indicate mean  $\pm$ s.d.(n=2); **D)** DNA methylation analysis of murine Gdf3 promoter in control, untreated and AZA-treated mice by Methylation Specific PCR (MSP).

**A**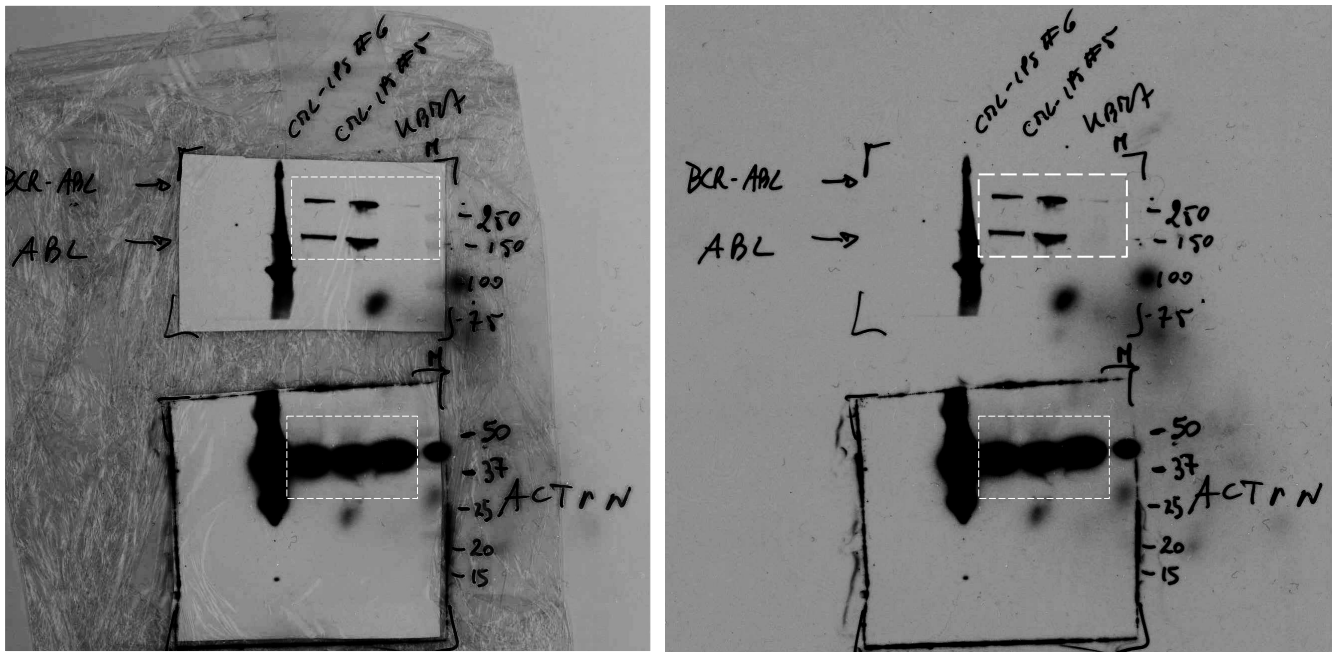**B**

Gdf3

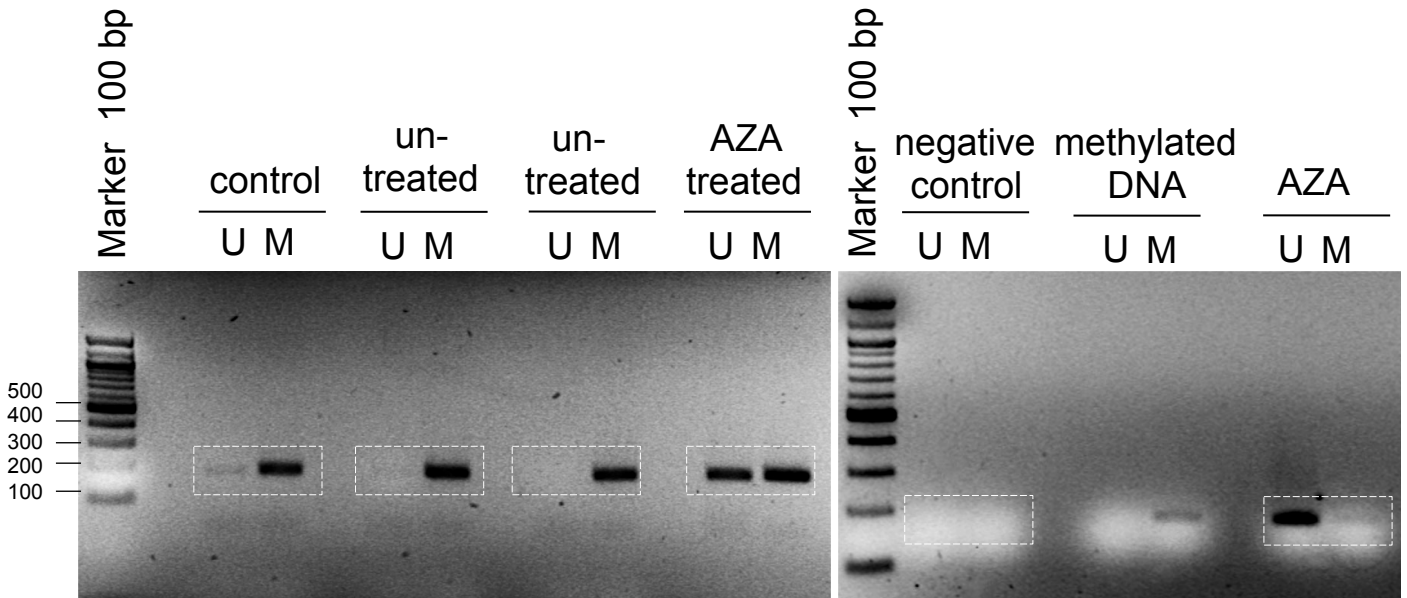

**Supplementary Figure 7. Full blot and gel.** **A** Full BCR-ABL western blot (with and without the membrane). The areas outlined by dotted white lines indicate the parts presented in Supplementary Figure 1C. **B** Full gel of murine Gdf 3 methylation analysis. The areas outlined by dotted white lines indicate the parts presented in Supplementary Figure 6D. (M: methylated; U: unmethylated).

**Supplementary Table\_1**

| <b>LiPSC_vs_cancer_GO_BP_hyper_promoters_top500</b> |               |                  |                 |              |             |                                                           |
|-----------------------------------------------------|---------------|------------------|-----------------|--------------|-------------|-----------------------------------------------------------|
| <b>GOMFID</b>                                       | <b>Pvalue</b> | <b>OddsRatio</b> | <b>ExpCount</b> | <b>Count</b> | <b>Size</b> | <b>Term</b>                                               |
| GO:0007159                                          | 0.0001        | 14.736           | 0.4278          | 5            | 25          | leukocyte cell-cell adhesion                              |
| GO:0050900                                          | 0.0002        | 4.0605           | 2.9773          | 11           | 174         | leukocyte migration                                       |
| GO:0048872                                          | 0.0003        | 4.2516           | 2.5837          | 10           | 151         | homeostasis of number of cells                            |
| GO:0045580                                          | 0.0005        | 6.6895           | 1.0095          | 6            | 59          | regulation of T cell differentiation                      |
| GO:0042110                                          | 0.0005        | 3.345            | 3.9013          | 12           | 228         | T cell activation                                         |
| GO:0060986                                          | 0.0008        | 11.1636          | 0.4278          | 4            | 25          | endocrine hormone secretion                               |
| GO:0009812                                          | 0.0009        | 116.1436         | 0.0513          | 2            | 3           | flavonoid metabolic process                               |
| GO:0071593                                          | 0.0009        | 116.1436         | 0.0513          | 2            | 3           | lymphocyte aggregation                                    |
| GO:0006952                                          | 0.0009        | 2.113            | 13.5175         | 26           | 790         | defense response                                          |
| GO:1990266                                          | 0.0016        | 9.0125           | 0.5133          | 4            | 30          | neutrophil migration                                      |
| GO:0045409                                          | 0.0017        | 58.0663          | 0.0684          | 2            | 4           | negative regulation of interleukin-6 biosynthetic process |
| GO:0045588                                          | 0.0017        | 58.0663          | 0.0684          | 2            | 4           | positive regulation of gamma-delta T cell differentiation |
| GO:0022610                                          | 0.0025        | 2.0732           | 11.4985         | 22           | 672         | biological adhesion                                       |
| GO:0042060                                          | 0.0026        | 2.3666           | 7.2721          | 16           | 425         | wound healing                                             |
| GO:0002227                                          | 0.0028        | 38.7072          | 0.0856          | 2            | 5           | innate immune response in mucosa                          |
| GO:0019731                                          | 0.0028        | 38.7072          | 0.0856          | 2            | 5           | antibacterial humoral response                            |
| GO:0045656                                          | 0.0028        | 38.7072          | 0.0856          | 2            | 5           | negative regulation of monocyte differentiation           |
| GO:0051459                                          | 0.0028        | 38.7072          | 0.0856          | 2            | 5           | regulation of corticotropin secretion                     |
| GO:0042089                                          | 0.0033        | 5.4401           | 1.0095          | 5            | 59          | cytokine biosynthetic process                             |
| GO:0042102                                          | 0.0039        | 6.8866           | 0.6502          | 4            | 38          | positive regulation of T cell proliferation               |
| GO:0050798                                          | 0.0039        | 10.9333          | 0.3251          | 3            | 19          | activated T cell proliferation                            |
| GO:0045086                                          | 0.0042        | 29.0276          | 0.1027          | 2            | 6           | positive regulation of interleukin-2 biosynthetic process |
| GO:0045579                                          | 0.0042        | 29.0276          | 0.1027          | 2            | 6           | positive regulation of B cell differentiation             |



|            |        |         |         |    |          |                                                                        |
|------------|--------|---------|---------|----|----------|------------------------------------------------------------------------|
| GO:0007229 | 0.0044 | 5.063   | 1.078   | 5  | 63       | integrin-mediated signaling pathway                                    |
| GO:0045321 | 0.0046 | 2.3564  | 6.3481  | 14 | 371      | leukocyte activation                                                   |
| GO:0098602 | 0.0047 | 2.6689  | 4.3975  | 11 | 257      | single organism cell adhesion                                          |
| GO:0006334 | 0.0053 | 4.8126  | 1.1293  | 5  | 66       | nucleosome assembly                                                    |
| GO:0050852 | 0.0053 | 4.8126  | 1.1293  | 5  | 66       | T cell receptor signaling pathway                                      |
| GO:0009312 | 0.0058 | 23.2199 | 0.1198  | 2  | 7        | oligosaccharide biosynthetic process                                   |
| GO:0046643 | 0.0058 | 23.2199 | 0.1198  | 2  | 7        | regulation of gamma-delta T cell activation                            |
| GO:0050896 | 0.0071 | 1.4585  | 82.0805 | 99 | 479<br>7 | response to stimulus                                                   |
| GO:0002260 | 0.0072 | 5.707   | 0.77    | 4  | 45       | lymphocyte homeostasis                                                 |
| GO:0051251 | 0.0075 | 3.305   | 2.2586  | 7  | 132      | positive regulation of lymphocyte activation                           |
| GO:0001553 | 0.0076 | 19.3481 | 0.1369  | 2  | 8        | luteinization                                                          |
| GO:0002251 | 0.0076 | 19.3481 | 0.1369  | 2  | 8        | organ or tissue specific immune response                               |
| GO:0042534 | 0.0076 | 19.3481 | 0.1369  | 2  | 8        | regulation of tumor necrosis factor biosynthetic process               |
| GO:0050911 | 0.0076 | 19.3481 | 0.1369  | 2  | 8        | detection of chemical stimulus involved in sensory perception of smell |
| GO:0002429 | 0.0081 | 3.2523  | 2.2928  | 7  | 134      | immune response-activating cell surface receptor signaling pathway     |
| GO:1902107 | 0.0082 | 4.3143  | 1.2491  | 5  | 73       | positive regulation of leukocyte differentiation                       |
| GO:0030098 | 0.0088 | 2.9206  | 2.9088  | 8  | 170      | lymphocyte differentiation                                             |
| GO:0045638 | 0.009  | 5.3164  | 0.8213  | 4  | 48       | negative regulation of myeloid cell differentiation                    |
| GO:0001894 | 0.0092 | 3.5655  | 1.7966  | 6  | 105      | tissue homeostasis                                                     |
| GO:0050776 | 0.0096 | 2.0884  | 7.6314  | 15 | 446      | regulation of immune response                                          |
| GO:0008272 | 0.0097 | 16.5825 | 0.154   | 2  | 9        | sulfate transport                                                      |
| GO:0014067 | 0.0097 | 16.5825 | 0.154   | 2  | 9        | negative regulation of phosphatidylinositol 3-kinase signaling         |
| GO:0045136 | 0.0097 | 16.5825 | 0.154   | 2  | 9        | development of secondary sexual characteristics                        |
| GO:2000833 | 0.0097 | 16.5825 | 0.154   | 2  | 9        | positive regulation of steroid hormone secretion                       |

| <b>LiPSC_vs_cancer_GO_BP_hypo_promoters_top500</b> |               |                  |                 |              |             |                                                        |
|----------------------------------------------------|---------------|------------------|-----------------|--------------|-------------|--------------------------------------------------------|
| <b>GOMFID</b>                                      | <b>Pvalue</b> | <b>OddsRatio</b> | <b>ExpCount</b> | <b>Count</b> | <b>Size</b> | <b>Term</b>                                            |
| GO:0032501                                         | 0             | 1.6932           | 103.5794        | 138          | 4043        | multicellular organismal process                       |
| GO:0035295                                         | 0.0002        | 2.3731           | 11.4775         | 25           | 448         | tube development                                       |
| GO:0032502                                         | 0.0002        | 1.6018           | 76.585          | 103          | 3097        | developmental process                                  |
| GO:0007275                                         | 0.0003        | 1.6337           | 60.7919         | 85           | 2537        | multicellular organismal development                   |
| GO:0010830                                         | 0.0005        | 6.8396           | 1.0248          | 6            | 40          | regulation of myotube differentiation                  |
| GO:0009888                                         | 0.0005        | 2.3599           | 10.131          | 22           | 414         | tissue development                                     |
| GO:0048513                                         | 0.0006        | 1.8539           | 24.521          | 41           | 1062        | organ development                                      |
| GO:0070294                                         | 0.0007        | Inf              | 0.0512          | 2            | 2           | renal sodium ion absorption                            |
| GO:0045661                                         | 0.0008        | 11.861           | 0.4355          | 4            | 17          | regulation of myoblast differentiation                 |
| GO:0003014                                         | 0.0011        | 5.8103           | 1.1785          | 6            | 46          | renal system process                                   |
| GO:0009887                                         | 0.0011        | 1.9812           | 15.798          | 29           | 621         | organ morphogenesis                                    |
| GO:0030182                                         | 0.0013        | 1.8087           | 22.1608         | 37           | 865         | neuron differentiation                                 |
| GO:0060562                                         | 0.0017        | 2.5435           | 6.328           | 15           | 247         | epithelial tube morphogenesis                          |
| GO:0014028                                         | 0.0019        | 76.6176          | 0.0769          | 2            | 3           | notochord formation                                    |
| GO:0021530                                         | 0.0019        | 76.6176          | 0.0769          | 2            | 3           | spinal cord oligodendrocyte cell fate specification    |
| GO:0061364                                         | 0.0019        | 76.6176          | 0.0769          | 2            | 3           | apoptotic process involved in luteolysis               |
| GO:0072197                                         | 0.0019        | 76.6176          | 0.0769          | 2            | 3           | ureter morphogenesis                                   |
| GO:0048869                                         | 0.002         | 1.4974           | 62.1784         | 83           | 2427        | cellular developmental process                         |
| GO:0042219                                         | 0.0024        | 14.4091          | 0.2818          | 3            | 11          | cellular modified amino acid catabolic process         |
| GO:0048741                                         | 0.0024        | 6.0345           | 0.9479          | 5            | 37          | skeletal muscle fiber development                      |
| GO:0007411                                         | 0.0024        | 2.3767           | 7.1991          | 16           | 281         | axon guidance                                          |
| GO:0045597                                         | 0.0025        | 2.0584           | 11.4263         | 22           | 446         | positive regulation of cell differentiation            |
| GO:0046579                                         | 0.0025        | 8.1107           | 0.5892          | 4            | 23          | positive regulation of Ras protein signal transduction |
| GO:0046717                                         | 0.0027        | 4.739            | 1.4091          | 6            | 55          | acid secretion                                         |

|            |        |         |          |     |      |                                                      |
|------------|--------|---------|----------|-----|------|------------------------------------------------------|
| GO:0048839 | 0.0029 | 3.046   | 3.5355   | 10  | 138  | inner ear development                                |
| GO:0010665 | 0.0031 | 12.8069 | 0.3074   | 3   | 12   | regulation of cardiac muscle cell apoptotic process  |
| GO:0043524 | 0.0032 | 3.5314  | 2.4595   | 8   | 96   | negative regulation of neuron apoptotic process      |
| GO:0044699 | 0.0036 | 1.5866  | 217.3554 | 235 | 8484 | single-organism process                              |
| GO:0052652 | 0.0038 | 3.8218  | 1.9983   | 7   | 78   | cyclic purine nucleotide metabolic process           |
| GO:0021779 | 0.0038 | 38.3051 | 0.1025   | 2   | 4    | oligodendrocyte cell fate commitment                 |
| GO:0021780 | 0.0038 | 38.3051 | 0.1025   | 2   | 4    | glial cell fate specification                        |
| GO:0033058 | 0.0038 | 38.3051 | 0.1025   | 2   | 4    | directional locomotion                               |
| GO:0072289 | 0.0038 | 38.3051 | 0.1025   | 2   | 4    | metanephric nephron tubule formation                 |
| GO:0060284 | 0.0045 | 1.9187  | 12.7585  | 23  | 498  | regulation of cell development                       |
| GO:0008584 | 0.0046 | 3.6658  | 2.0752   | 7   | 81   | male gonad development                               |
| GO:0009968 | 0.0049 | 1.7901  | 16.6783  | 28  | 651  | negative regulation of signal transduction           |
| GO:0009187 | 0.0049 | 3.269   | 2.6388   | 8   | 103  | cyclic nucleotide metabolic process                  |
| GO:0030903 | 0.0049 | 10.4764 | 0.3587   | 3   | 14   | notochord development                                |
| GO:0060579 | 0.0049 | 10.4764 | 0.3587   | 3   | 14   | ventral spinal cord interneuron fate commitment      |
| GO:0006935 | 0.005  | 1.9986  | 10.6321  | 20  | 415  | chemotaxis                                           |
| GO:0022008 | 0.005  | 1.6355  | 25.5938  | 39  | 999  | neurogenesis                                         |
| GO:0007268 | 0.0051 | 1.8978  | 12.8866  | 23  | 503  | synaptic transmission                                |
| GO:0000904 | 0.0056 | 1.8085  | 15.2948  | 26  | 597  | cell morphogenesis involved in differentiation       |
| GO:0071300 | 0.0056 | 4.8239  | 1.1529   | 5   | 45   | cellular response to retinoic acid                   |
| GO:0007423 | 0.0059 | 2.0474  | 9.3255   | 18  | 364  | sensory organ development                            |
| GO:0010658 | 0.006  | 9.6024  | 0.3843   | 3   | 15   | striated muscle cell apoptotic process               |
| GO:0060429 | 0.0061 | 1.7233  | 18.5485  | 30  | 724  | epithelium development                               |
| GO:0030802 | 0.0062 | 3.932   | 1.6653   | 6   | 65   | regulation of cyclic nucleotide biosynthetic process |
| GO:0045137 | 0.0062 | 2.7033  | 3.9454   | 10  | 154  | development of primary sexual characteristics        |
| GO:0007154 | 0.0066 | 1.376   | 93.0755  | 113 | 3633 | cell communication                                   |

|            |        |         |         |    |     |                                                      |
|------------|--------|---------|---------|----|-----|------------------------------------------------------|
| GO:0030814 | 0.0072 | 3.8023  | 1.7165  | 6  | 67  | regulation of cAMP metabolic process                 |
| GO:1900371 | 0.0072 | 3.8023  | 1.7165  | 6  | 67  | regulation of purine nucleotide biosynthetic process |
| GO:0072078 | 0.0073 | 8.8629  | 0.4099  | 3  | 16  | nephron tubule morphogenesis                         |
| GO:0090103 | 0.0073 | 8.8629  | 0.4099  | 3  | 16  | cochlea morphogenesis                                |
| GO:0031960 | 0.0073 | 3.3467  | 2.2545  | 7  | 88  | response to corticosteroid                           |
| GO:0007186 | 0.0073 | 1.9996  | 9.5336  | 18 | 378 | G-protein coupled receptor signaling pathway         |
| GO:0002444 | 0.0077 | 5.7032  | 0.7942  | 4  | 31  | myeloid leukocyte mediated immunity                  |
| GO:0051148 | 0.0077 | 5.7032  | 0.7942  | 4  | 31  | negative regulation of muscle cell differentiation   |
| GO:0097305 | 0.0078 | 2.4776  | 4.714   | 11 | 184 | response to alcohol                                  |
| GO:0002064 | 0.0079 | 2.7749  | 3.4586  | 9  | 135 | epithelial cell development                          |
| GO:0051093 | 0.0082 | 1.8696  | 11.8874 | 21 | 464 | negative regulation of developmental process         |
| GO:0030324 | 0.0082 | 2.7528  | 3.4842  | 9  | 136 | lung development                                     |
| GO:0007218 | 0.0083 | 3.6809  | 1.7677  | 6  | 69  | neuropeptide signaling pathway                       |
| GO:0016486 | 0.0087 | 8.229   | 0.4355  | 3  | 17  | peptide hormone processing                           |
| GO:0007168 | 0.0092 | 19.1489 | 0.1537  | 2  | 6   | receptor guanylyl cyclase signaling pathway          |
| GO:0051823 | 0.0092 | 19.1489 | 0.1537  | 2  | 6   | regulation of synapse structural plasticity          |
| GO:2000252 | 0.0092 | 19.1489 | 0.1537  | 2  | 6   | negative regulation of feeding behavior              |
| GO:0007517 | 0.0092 | 2.2267  | 6.1743  | 13 | 241 | muscle organ development                             |
| GO:0055002 | 0.0092 | 3.188   | 2.357   | 7  | 92  | striated muscle cell development                     |

**Supplementary Table 1.** Gene Ontology categories associated with hyper- or hypomethylated promoters in LiPs *versus* CML.

Supplementary Table\_2

| <b>promoter name</b> | <b>mean methylation in control mice</b> | <b>mean methylation in sick (leukemic) mice</b> | <b>difference between control and sick mice</b> |
|----------------------|-----------------------------------------|-------------------------------------------------|-------------------------------------------------|
| Traip                | 0.146391666666667                       | 0.7941                                          | -0.701316666666667                              |
| C130050O18Rik        | 0.358637234042553                       | 0.754273076923077                               | -0.395635842880524                              |
| Ntn1                 | 0.0251576923076923                      | 0.365277777777778                               | -0.340112393162393                              |
| NA                   | 0.50395                                 | 0.9                                             | -0.39605                                        |
| Gnas                 | 0.440853936298077                       | 0.737755110062893                               | -0.296901173764816                              |
| BC046401             | 0.475271036877395                       | 0.679853574611663                               | -0.204582537734268                              |
| Mir1905              | 0.56596969981697                        | 0.756290095039888                               | -0.216809513421375                              |
| Nap1l5               | 0.54281                                 | 0.74886                                         | -0.20605                                        |
| Gm4252               | 0.645440461060612                       | 0.810739743589744                               | -0.207317698617393                              |
| Gm20546              | 0.645440461060612                       | 0.810739743589744                               | -0.207317698617393                              |
| Ptafr                | 0.65875                                 | 0.9                                             | -0.207916666666667                              |
| Gm17033              | 0.713840911973617                       | 0.928211170212766                               | -0.214370258239149                              |
| Gm7271               | 0.55995                                 | 0.911775                                        | -0.351825                                       |
| Mecom                | 0.84405                                 | 1                                               | -0.24015                                        |
| NA                   | 0.0594333333333333                      | 0.451283333333333                               | -0.39185                                        |
| Vgll4                | 0.185076923076923                       | 0.416217443249701                               | -0.231140520172778                              |
| Hpca                 | 0.3082                                  | 0.4405                                          | -0.2202                                         |
| Tmc8                 | 0.00859411764705882                     | 0.366666666666667                               | -0.363041666666667                              |
| 3830406C13Rik        | 0.223962666666667                       | 0.285714285714286                               | -0.220046666666667                              |
| Bdnf                 | 0.096538474025974                       | 0.354166666666667                               | -0.257628192640693                              |
| 9130019O22Rik        | 0.04275                                 | 0.301275                                        | -0.258525                                       |
| Gm14303              | 0.72315                                 | 0.9605875                                       | -0.2374375                                      |
| Gm16152              | 0.528083333333333                       | 1                                               | -0.3196                                         |
| Kcnj13               | 0.772                                   | 1                                               | -0.206                                          |
| Gm13217              | 0.3884                                  | 0.530216666666667                               | -0.3973                                         |
| H13                  | 0.147725                                | 0.35715                                         | -0.209425                                       |
| Gm14494              | 0.45486                                 | 0.616608333333333                               | -0.23182                                        |
| Wfdc15a              | 0.554266666666667                       | 1                                               | -0.385125                                       |
| Gm9857               | 0.5422125                               | 0.779375                                        | -0.2371625                                      |
| 4921515J06Rik        | 0.5422125                               | 0.779375                                        | -0.2371625                                      |
| Gm12384              | 0.0721                                  | 0.35665                                         | -0.28455                                        |
| Gm11222              | 0.5833                                  | 0.94445                                         | -0.36115                                        |
| Ube2u                | 0.42889387755102                        | 0.676043879781421                               | -0.2471500022304                                |
| NA                   | 0.78215                                 | 1                                               | -0.21785                                        |
| Csn3                 | 0.4345                                  | 1                                               | -0.4643                                         |
| Gm7932               | 0.4286                                  | 0.277783333333333                               | -0.40475                                        |
| Gdf3                 | 0.2967                                  | 0.6316                                          | -0.3349                                         |
| Gm17263              | 0.45318970464135                        | 0.8                                             | -0.316365443037975                              |
| Hapln3               | 0.116125                                | 0.8333                                          | -0.6822                                         |
| Ctfl                 | 0.2217                                  | 0.5385                                          | -0.3168                                         |

|                       |                                         |                                                 |                                                 |
|-----------------------|-----------------------------------------|-------------------------------------------------|-------------------------------------------------|
| Gm17387               | 0.6667                                  | 1                                               | -0.3333                                         |
| Gm15303               | 0.29005                                 | 0.5                                             | -0.20995                                        |
| Ap1m2                 | 0.5556                                  | 0.7857                                          | -0.2301                                         |
| Rps6-ps3              | 0.5917                                  | 0.8621                                          | -0.2704                                         |
| NA                    | 0.635708750208098                       | 0.902559487179487                               | -0.262920525391307                              |
| 1700048O20Rik         | 0.520116666666667                       | 0.7375333333333333                              | -0.217416666666667                              |
| Gm10275               | 0.2564                                  | 0.6226                                          | -0.3662                                         |
| Prdm1                 | 0.0935416666666667                      | 0.4893                                          | -0.3489875                                      |
| Ano4                  | 0.00231666666666667                     | 0.313710752688172                               | -0.445566129032258                              |
| 4933414I15Rik         | 0.57827                                 | 0.99255                                         | -0.37755                                        |
| Gm12246               | 0.796525                                | 1                                               | -0.203475                                       |
| Hoxb1                 | 0.045125                                | 0.30505                                         | -0.259925                                       |
| Tom20l                | 0.104166666666667                       | 0.454566666666667                               | -0.3504                                         |
| Mir539                | 0.04375                                 | 0.266675                                        | -0.222925                                       |
| Mir544                | 0.04375                                 | 0.266675                                        | -0.222925                                       |
| 4930563I02Rik         | 0.0733906788710908                      | 0.318195454545455                               | -0.210403078496637                              |
|                       |                                         |                                                 |                                                 |
|                       |                                         |                                                 |                                                 |
| <b>gene body name</b> | <b>mean methylation in control mice</b> | <b>mean methylation in sick (leukemic) mice</b> | <b>difference between control and sick mice</b> |
| Gm14204               | 0.022925                                | 0.9128833333333333                              | -0.8878833333333333                             |
| Rdh8                  | 0.37625                                 | 0.7457                                          | -0.21705                                        |
| NA                    | 0.319069596153846                       | 0.597629047619048                               | -0.278559451465201                              |
| Impact                | 0.3568083333333333                      | 0.669325                                        | -0.312516666666667                              |
| NA                    | 0.50395                                 | 0.9                                             | -0.39605                                        |
| C130050O18Rik         | 0.542908814589666                       | 0.632323846153846                               | -0.229951505728314                              |
| Gm4252                | 0.743934584699454                       | 0.961538461538462                               | -0.312294292139554                              |
| Ctf1                  | 0.20855043983615                        | 0.415647489564007                               | -0.207097049727858                              |
| Mex3a                 | 0.567144674831049                       | 0.749702153376111                               | -0.206741255642474                              |
| AI747448              | 0.556675                                | 0.85835                                         | -0.301675                                       |
| Nap1l5                | 0.54281                                 | 0.74886                                         | -0.20605                                        |
| 2410137F16Rik         | 0.657622739541161                       | 0.859663461538462                               | -0.202040721997301                              |
| Gm17033               | 0.696654549298157                       | 0.904281560283688                               | -0.207627010985531                              |
| Gm11052               | 0.7167                                  | 0.93405                                         | -0.21735                                        |
| Gm14228               | 0.7780125                               | 1                                               | -0.2219875                                      |
| Vmn2r109              | 0.747725                                | 0.959175                                        | -0.21145                                        |
| C1rl                  | 0.57287380952381                        | 0.9655                                          | -0.201428571428572                              |
| Zfp174                | 0.062270125                             | 0.309566666666667                               | -0.209666458333333                              |
| Skint4                | 0.4574333333333333                      | 0.6831333333333333                              | -0.2257                                         |
| 3830406C13Rik         | 0.223962666666667                       | 0.285714285714286                               | -0.220046666666667                              |
| Neil2                 | 0.703525                                | 1                                               | -0.296475                                       |
| H2-M5                 | 0.13303                                 | 0.413575                                        | -0.280545                                       |

|                      |                    |                    |                    |
|----------------------|--------------------|--------------------|--------------------|
| <b>Gm14319</b>       | 0.569              | 0.6684             | -0.209             |
| <b>2410152P15Rik</b> | 0.693875           | 0.6578125          | -0.213116666666667 |
| <b>Pla2g4d</b>       | 0.531491666666667  | 0.700878571428571  | -0.236346428571429 |
| <b>1700007G11Rik</b> | 0.808748182773109  | 0.932746           | -0.210118907563025 |
| <b>Gm7137</b>        | 0.7112             | 0.7777             | -0.206925          |
| <b>Nostrin</b>       | 0.137917307692308  | 0.3636             | -0.225682692307692 |
| <b>6030422M02Rik</b> | 0.11015            | 0.5714             | -0.46125           |
| <b>Gm11608</b>       | 0.1414030303030303 | 0.3889             | -0.24749696969697  |
| <b>Kcnj13</b>        | 0.772              | 1                  | -0.206             |
| <b>Serpinb5</b>      | 0.805175           | 1                  | -0.22925           |
| <b>Ptpn7</b>         | 0.681425           | 0.485887096774194  | -0.282212096774194 |
| <b>Gm13217</b>       | 0.3884             | 0.7857             | -0.3973            |
| <b>Gm13767</b>       | 0.402285714285714  | 0.640471428571429  | -0.238185714285714 |
| <b>1810024B03Rik</b> | 0                  | 0.25               | -0.25              |
| <b>Gm14494</b>       | 0.45486            | 0.6166083333333333 | -0.23182           |
| <b>Gm16098</b>       | 0.10365            | 0.4615             | -0.35785           |
| <b>1700013F07Rik</b> | 0.7965333333333333 | 1                  | -0.31415           |
| <b>Gm9857</b>        | 0.5422125          | 0.779375           | -0.2371625         |
| <b>4921515J06Rik</b> | 0.5422125          | 0.6235             | -0.2371625         |
| <b>Gm12384</b>       | 0.0721             | 0.594975           | -0.28455           |
| <b>Gm11222</b>       | 0.776025           | 0.94445            | -0.36115           |
| <b>Gm12746</b>       | 0.5445333333333333 | 0.91665            | -0.409425          |
| <b>Tnfrsf1b</b>      | 0.7149125          | 0.8889             | -0.28785           |
| <b>2310043J07Rik</b> | 0.0625             | 0.3158             | -0.2533            |
| <b>4930448H16Rik</b> | 0.67345            | 0.8                | -0.4293            |
| <b>Ocm</b>           | 0.715              | 1                  | -0.285             |
| <b>1110019D14Rik</b> | 0.67645            | 1                  | -0.32355           |
| <b>Lrguk</b>         | 0.5                | 0.8788             | -0.3182            |
| <b>Abp1</b>          | 0.0294             | 0.8                | -0.7706            |
| <b>Zfp551</b>        | 0.38475            | 0.8333             | -0.2681            |
| <b>Gm16282</b>       | 0.790475           | 1                  | -0.25              |
| <b>Gm6226</b>        | 0.0820166666666667 | 0.3146333333333333 | -0.232616666666667 |
| <b>Gm16159</b>       | 0.6993             | 0.9593             | -0.26              |
| <b>Chrna6</b>        | 0.642975           | 0.9348             | -0.291825          |
| <b>Purg</b>          | 0.376152196969697  | 0.704761904761905  | -0.203225642135642 |
| <b>9330133O14Rik</b> | 0.2645             | 0.519275           | -0.254775          |
| <b>Gm15606</b>       | 0.6655             | 0.9                | -0.2345            |
| <b>Rps6-ps3</b>      | 0.5917             | 0.8621             | -0.2704            |
| <b>Gcm1</b>          | 0.6667             | 0.86               | -0.2333            |
| <b>Il20rb</b>        | 0.75               | 1                  | -0.25              |
| <b>4930535L15Rik</b> | 0.08665            | 0.625              | -0.4517            |
| <b>Gm10275</b>       | 0.2564             | 0.6226             | -0.3662            |
| <b>8430429K09Rik</b> | 0.2255613333333333 | 0.70835            | -0.35275           |

|                      |                   |                   |                    |
|----------------------|-------------------|-------------------|--------------------|
| <b>D130052B06Rik</b> | 0.8296            | 0.8333            | -0.27175           |
| <b>4933414I15Rik</b> | 0.657371428571429 | 0.935675          | -0.2006125         |
| <b>Gm12246</b>       | 0.796525          | 1                 | -0.203475          |
| <b>Gm12278</b>       | 0.760469608636977 | 0.730775          | -0.302995587044534 |
| <b>Aloxe3</b>        | 0.890759856630824 | 1                 | -0.221620430107527 |
| <b>Vps53</b>         | 0.77215           | 1                 | -0.22785           |
| <b>Slfn2</b>         | 0                 | 0.388397413793103 | -0.388397413793103 |
| <b>C330019F10Rik</b> | 0.8498            | 1                 | -0.24745           |

**Supplementary Table 2.** The table shows methylation values of gene promoters (upper part) and gene bodies (lower part) which gain significant aberrant methylation after BCR-ABL activation (sick mice) in HSCs population.
